# Supplementary material for: Liquid–liquid extraction in flow of the radioisotope titanium-45 for positron emission tomography applications
Source: Royal Society of Chemistry journal article supplement (doi:10.1039/c8re00175h), 2018-01-01
Supplement: c8re00175h1.pdf [file c8re00175h1.pdf]

## Supplementary Information

### Liquid-liquid extraction in flow of the radioisotope titanium-45 for positron emission tomography applications

Kristina Søborg Pedersen,<sup>a,b§</sup> Joseph Imbrogno<sup>b§</sup>, Jesper Fonslet<sup>a</sup>, Marcella Lusardi<sup>c</sup>, Klavs F. Jensen<sup>b,c\*</sup>, and Fedor Zhuravlev<sup>a\*</sup>

<sup>a</sup>Technical University of Denmark, Center for Nuclear Technologies, Frederiksborgvej 399, Building 202, 4000 Roskilde, Denmark, tel: +45 46775337, fax: +45 4677 5347

<sup>b</sup>Department of Chemical Engineering, Massachusetts Institute of Technology, Cambridge, MA, 02139, USA

<sup>c</sup>Department of Materials Science and Engineering, Massachusetts Institute of Technology, Cambridge, MA, 02139, USA

§ K.S.P. and J.I. contributed equally to this work

**Figure S1.** The calculated interfacial tension between the aqueous conc. hydrochloric acid phase and the guaiacol-anisole phase as a function of anisole vol. %. The calculations were performed with COSMOthermX at TZVPD-FINE level using HCl(H<sub>2</sub>O)<sub>4</sub> cluster (inset) as a model for conc. aqueous HCl.

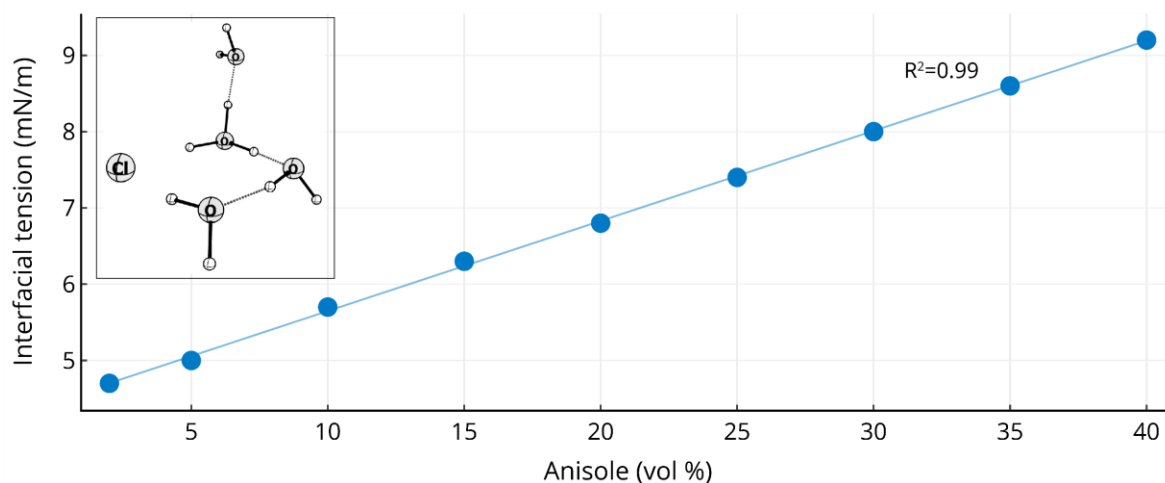

**Table S1.** Aqueous (aq) to organic (org) flow rate ratios with corresponding volumetric flow rates (total flow rate = 0.20 mL/min) and extraction of titanium using guaiacol/anisole mixtures.

| aq/org flow ratio [-] | aq flow rate [mL/min] | org flow rate [mL/min] | Extraction [%] guaiacol/anisole 75/25, (v/v) | Extraction [%] guaiacol/anisole 90/10, (v/v) |
|-----------------------|-----------------------|------------------------|----------------------------------------------|----------------------------------------------|
| 1/1                   | 0.1                   | 0.1                    | 70                                           | -                                            |
| 1/3                   | 0.15                  | 0.05                   | 85                                           | 90                                           |
| 1/5                   | 0.17                  | 0.03                   | -                                            | 90                                           |

**Table S2.** Separation performance for various membrane pore sizes and diaphragm thicknesses for 37% HCl mixed with either 1-octanol or 1:1 guaiacol/anisole.

| Membrane Pore Size [ $\mu\text{m}$ ]    | Diaphragm Thickness [in.] | Performance            |
|-----------------------------------------|---------------------------|------------------------|
| <b>37% HCl and 1-octanol</b>            |                           |                        |
| 0.5                                     | 0.005                     | Breakthrough           |
|                                         | 0.002                     | Breakthrough           |
|                                         | 0.001                     | Breakthrough           |
| 0.2                                     | 0.001                     | Breakthrough           |
| 0.1                                     | 0.001                     | Retention/Breakthrough |
| <b>37% HCl and 1:1 Guaiacol/Anisole</b> |                           |                        |
| 0.5                                     | 0.005                     | Breakthrough           |
|                                         | 0.002                     | Breakthrough           |
|                                         | 0.001                     | Retention              |
| 0.2                                     | 0.002                     | Complete Separation    |
